# Supplementary material for: Development of an automated pump efficiency measuring system for ozonesonde utilizing the airbag type flowmeter
Source: Copernicus journal article supplement (doi:10.5194/egusphere-2022-565), 2022-08-19

# Response to comments from Anonymous Referee #1 on manuscript egusphere2022-565: “Development of an automated pump efficiency measuring system for ozonesonde utilizing the airbag type flowmeter”

We appreciate your valuable comments on our paper.

## General remarks:

The paper is well structured and written, whereby it is recommended that a native English speaking person should improve some of the English in the paper.

We are considering to make proofreading by a native speaker.

## Some comments

- L10 Replace: emulating by simulating
- L14 Replace: accumulated by collected
- L24 Replace: the detailed by a detailed
- L25 Replace: flew up by flown
- L27 Replace: chemical by electrochemical
- L31 Replace: 80% by more than 90%
- L62 Replace: research themes in the past by other investigators
- L63/64 Replace silicone membrane by bubble
- L66 Replace: the ECC- by ECC-
- L124 Replace: to a small by of a small

We will replace as you stated.

Figure 8: Larger charactersize in legends

We increased charactersize in legends. We will modify the diagram as follows.

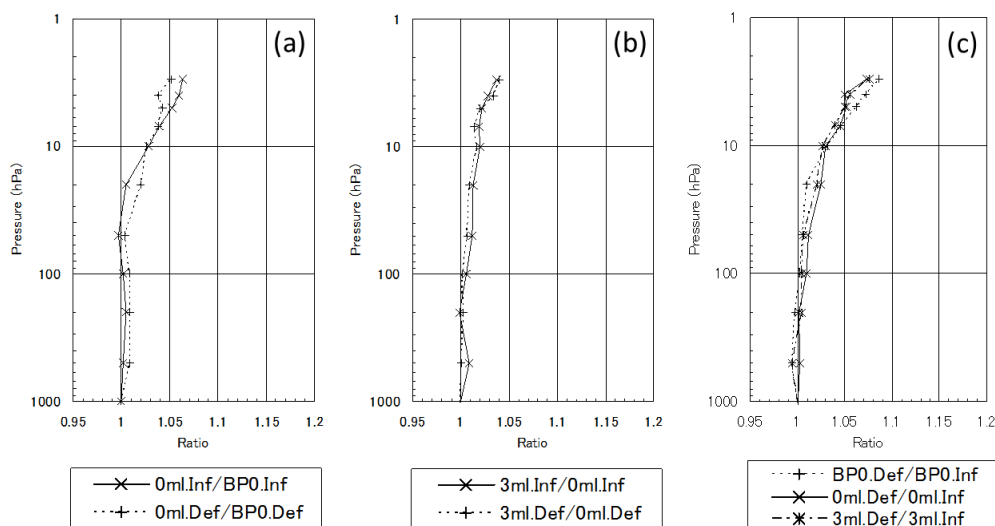

To be clear to the reader that after section 3-3 all further pump efficiencies reported in chapters 4 and 5 are always measured and determined with a 3 ml sensing solution in the cathode cell.

At the end of line 237 in section 3.3, we will note that "All further pump correction factors reported in chapters 4 and 5 are always measured and determined with a 3 ml reaction solution in the cathode cell."

Figure 16: Larger charactersize of axis

We increased charactersize of axis. We will modify the diagram as follows.

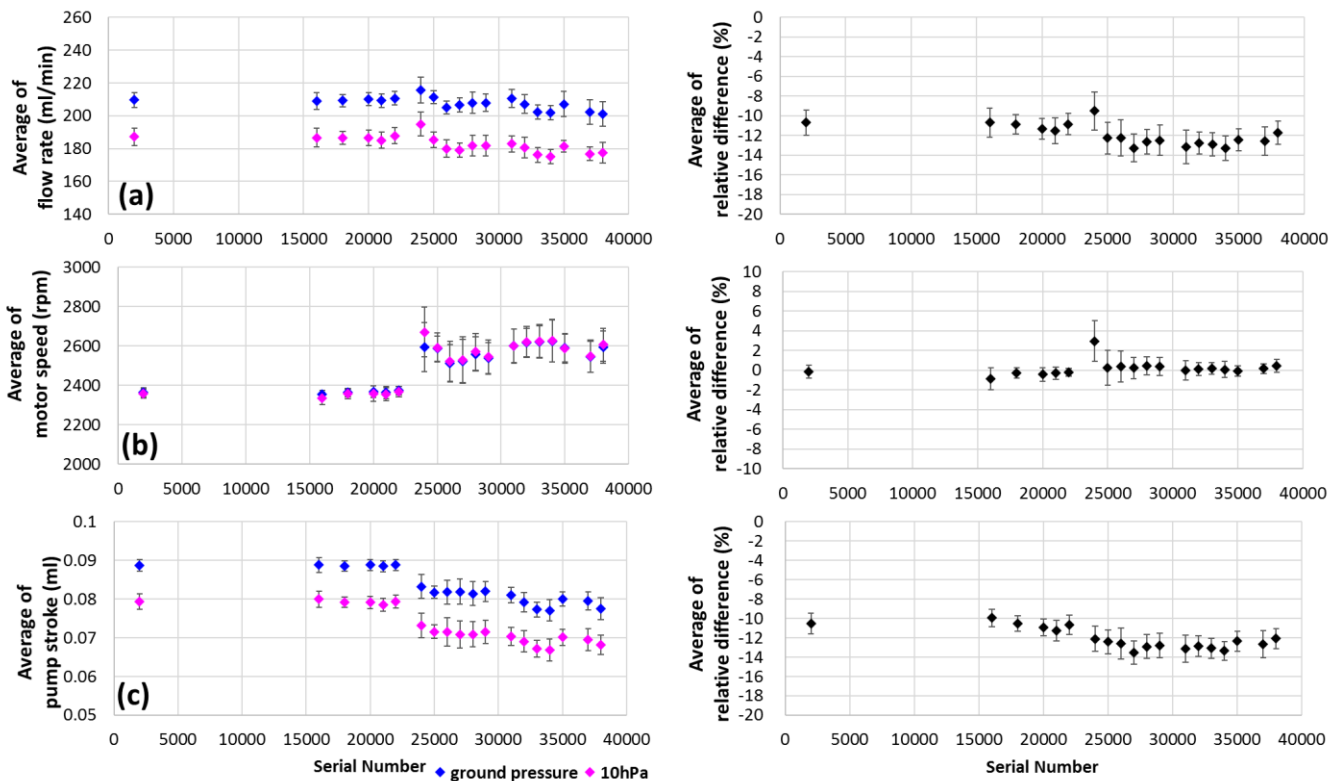

Supplement: Supplementary file [file egusphere-2022-565-AC1-supplement.pdf]
